# Supplementary material
Source: MDPI journal article supplement (https://www.mdpi.com/2297-8739/9/1/12)
Supplement: s1 [file s1]

## Supplementary Material

**Table S1.** Characteristics and Pb Concentrations of the Soils from Walker Riverside Park.

| Sampling Locations | Soil pH | Soil pH, mean $\pm$ SD*   | Soil %OM | Soil %OM, mean $\pm$ SD*   | Pb concentration, mean $\pm$ SD (mg/kg) | Pb concentration, mean at sampling location (minimum – maximum) <sup>†</sup> (mg/kg) |
|--------------------|---------|---------------------------|----------|----------------------------|-----------------------------------------|--------------------------------------------------------------------------------------|
| A                  | 6.6     | 7.2 $\pm$ 0.5<br>(n = 4)  | 9.9      | 13.9 $\pm$ 4.9<br>(n = 4)  | 82.5 $\pm$ 0.4                          | 564<br>(231 – 1301)<br>N = 4                                                         |
| A                  | 7.1     |                           | 20.6     |                            | 1,301 $\pm$ 1                           |                                                                                      |
| A                  | 7.7     |                           | 14.7     |                            | 640 $\pm$ 1                             |                                                                                      |
| A                  | 7.5     |                           | 10.5     |                            | 231 $\pm$ 1                             |                                                                                      |
| B                  | 6.9     | 7.1 $\pm$ 0.7<br>(n = 18) | 15.6     | 15.9 $\pm$ 2.6<br>(n = 18) | 8,918 $\pm$ 4                           | 12,350<br>(103 – 206,000)<br>N = 18                                                  |
| B                  | 7.4     |                           | 15.3     |                            | 224 $\pm$ 1                             |                                                                                      |
| B                  | 6.5     |                           | 14.4     |                            | 155 $\pm$ 1                             |                                                                                      |
| B                  | 6.8     |                           | 19.1     |                            | 1,260 $\pm$ 1                           |                                                                                      |
| B                  | 6.0     |                           | 16.7     |                            | 298 $\pm$ 1                             |                                                                                      |
| B                  | 7.2     |                           | 20.6     |                            | 746 $\pm$ 1                             |                                                                                      |
| B                  | 7.8     |                           | 14.1     |                            | 206,000 $\pm$ 100                       |                                                                                      |
| B                  | 7.5     |                           | 11.7     |                            | 115 $\pm$ 0.5                           |                                                                                      |
| B                  | 7.1     |                           | 18.3     |                            | 675 $\pm$ 1                             |                                                                                      |
| B                  | 7.7     |                           | 12.3     |                            | 431 $\pm$ 0.8                           |                                                                                      |
| B                  | 7.4     |                           | 17.3     |                            | 1,180 $\pm$ 1                           |                                                                                      |
| B                  | 7.2     |                           | 19.1     |                            | 103 $\pm$ 0.4                           |                                                                                      |
| B                  | 6.8     |                           | 16.1     |                            | 527 $\pm$ 1                             |                                                                                      |
| B                  | 7.7     |                           | 15.3     |                            | 282 $\pm$ 1                             |                                                                                      |
| B                  | 5.2     |                           | 18.4     |                            | 669 $\pm$ 1                             |                                                                                      |
| B                  | 7.8     |                           | 12.5     |                            | 127 $\pm$ 1                             |                                                                                      |
| B                  | 7.5     |                           | 16.5     |                            | 135 $\pm$ 1                             |                                                                                      |
| B                  | 7.2     |                           | 12.9     |                            | 454 $\pm$ 1                             |                                                                                      |
| C                  | 7.2     | 7.0 $\pm$ 0.6<br>(n = 9)  | 17.0     | 18.5 $\pm$ 7.8<br>(n = 8)  | 3,634 $\pm$ 2                           | 11,745<br>(85.8 – 67,298)<br>N = 9                                                   |
| C                  | 6.5     |                           | 18.1     |                            | 513 $\pm$ 1                             |                                                                                      |
| C                  | 6.8     |                           | na       |                            | 1,748 $\pm$ 2                           |                                                                                      |
| C                  | 7.4     |                           | 23.0     |                            | 85.8 $\pm$ 0.4                          |                                                                                      |
| C                  | 5.7     |                           | 25.1     |                            | 669 $\pm$ 1                             |                                                                                      |
| C                  | 7.0     |                           | 18.4     |                            | 30,882 $\pm$ 10                         |                                                                                      |
| C                  | 7.3     |                           | 13.1     |                            | 512 $\pm$ 1                             |                                                                                      |
| C                  | 7.8     |                           | 10.3     |                            | 366 $\pm$ 1                             |                                                                                      |
| C                  | 7.0     |                           | 23.1     |                            | 67,298 $\pm$ 1                          |                                                                                      |
| D                  | 6.8     | 7.0 $\pm$ 0.5<br>(n = 13) | 25.1     | 16.3 $\pm$ 8.6<br>(n = 10) | 612 $\pm$ 1                             | 953<br>(88.4 – 5,289)<br>N = 13                                                      |
| D                  | 7.1     |                           | 21.6     |                            | 1517 $\pm$ 2                            |                                                                                      |
| D                  | 7.0     |                           | 17.2     |                            | 4,72 $\pm$ 1                            |                                                                                      |
| D                  | 6.9     |                           | 16.9     |                            | 88.8 $\pm$ 0.5                          |                                                                                      |
| D                  | 5.7     |                           | na       |                            | 688 $\pm$ 1                             |                                                                                      |
| D                  | 7.3     |                           | 10.1     |                            | 94.5 $\pm$ 0.4                          |                                                                                      |
| D                  | 7.5     |                           | na       |                            | 532 $\pm$ 1                             |                                                                                      |
| D                  | 7.2     |                           | 14.4     |                            | 122 $\pm$ 0.5                           |                                                                                      |
| D                  | 7.3     |                           | na       |                            | 301 $\pm$ 1                             |                                                                                      |

|   |     |                       |      |                        |            |                                 |
|---|-----|-----------------------|------|------------------------|------------|---------------------------------|
| D | 6.5 |                       | 9.2  |                        | 105 ± 0.1  |                                 |
| D | 7.1 |                       | 14.0 |                        | 5,289 ± 1  |                                 |
| D | 6.7 |                       | 22.8 |                        | 2,482 ± 1  |                                 |
| D | 7.9 |                       | 11.8 |                        | 88.4 ± 0.4 |                                 |
| E | 7.1 | 6.7 ± 0.5<br>(n = 7)  | 14.8 | 12.6 ± 3.8<br>(n = 7)  | 84.7 ± 0.4 | 727<br>(84.7 – 2,567)<br>N = 7  |
| E | 6.9 |                       | 14.9 |                        | 279 ± 1    |                                 |
| E | 6.3 |                       | 18.9 |                        | 253 ± 1    |                                 |
| E | 7.2 |                       | 12.5 |                        | 1,058 ± 1  |                                 |
| E | 5.7 |                       | 8.4  |                        | 2,567 ± 2  |                                 |
| E | 6.5 |                       | 9.0  |                        | 127 ± 1    |                                 |
| E | 7.0 |                       | 10.0 |                        | 718 ± 1    |                                 |
| F | 6.7 | 6.9 ± 0.3<br>(n = 16) | 25.9 | 15.8 ± 3.8<br>(n = 16) | 367 ± 1    | 314<br>(69.6 – 1,005)<br>N = 16 |
| F | 6.6 |                       | 14.2 |                        | 268 ± 1    |                                 |
| F | 7.2 |                       | 14.7 |                        | 278 ± 1    |                                 |
| F | 7.3 |                       | 20.1 |                        | 259 ± 1    |                                 |
| F | 7.1 |                       | 19.7 |                        | 174 ± 1    |                                 |
| F | 6.6 |                       | 15.5 |                        | 208 ± 1    |                                 |
| F | 7.2 |                       | 14.6 |                        | 168 ± 0.6  |                                 |
| F | 6.6 |                       | 15.1 |                        | 491 ± 1    |                                 |
| F | 7.3 |                       | 15.2 |                        | 137 ± 1    |                                 |
| F | 6.6 |                       | 19.8 |                        | 69.6 ± 1   |                                 |
| F | 7.1 |                       | 11.7 |                        | 133 ± 0.5  |                                 |
| F | 7.4 |                       | 13.4 |                        | 1,005 ± 2  |                                 |
| F | 6.6 |                       | 12.9 |                        | 417 ± 1    |                                 |
| F | 6.4 |                       | 13.2 |                        | 554 ± 1    |                                 |
| F | 6.5 |                       | 11.6 |                        | 233 ± 1    |                                 |
| F | 7.0 |                       | 15.6 |                        | 260 ± 1    |                                 |
| G | 7.0 | 7.2 ± 0.4<br>(n = 3)  | 14.0 | 13.3 ± 0.7<br>(n = 3)  | 215 ± 0.6  | 742<br>(197 – 1,814)<br>N = 3   |
| G | 7.0 |                       | 12.7 |                        | 197 ± 1    |                                 |
| G | 7.7 |                       | 13.1 |                        | 1,814 ± 6  |                                 |
| H | 6.7 | 7.4 ± 0.5<br>(n = 8)  | 19.3 | 13.9 ± 4.0<br>(n = 9)  | 324 ± 1    | 1417<br>(94.1 – 9,519)<br>N = 9 |
| H | 8.0 |                       | 10.2 |                        | 9,519 ± 5  |                                 |
| H | 7.4 |                       | 10.1 |                        | 94.1 ± 0.5 |                                 |
| H | 7.2 |                       | 17.7 |                        | 111 ± 0.5  |                                 |
| H | 6.9 |                       | 17.8 |                        | 186 ± 1    |                                 |
| H | 7.8 |                       | 15.4 |                        | 966 ± 1    |                                 |
| H | 7.1 |                       | 15.8 |                        | 1,171 ± 1  |                                 |
| H | 7.8 |                       | 9.5  |                        | 186 ± 1    |                                 |
| H | NA  |                       | 9.7  |                        | 198 ± 1    |                                 |

\* N = number of determinations
